# Supplementary material for: From supramolecular hydrogels to functional aerogels: a facile strategy to fabricate Fe3O4/N-doped graphene composites
Source: Royal Society of Chemistry journal article supplement (doi:10.1039/c5ra15595a), 2015-01-01
Supplement: c5ra15595a1.pdf [file c5ra15595a1.pdf]

## Electronic Supplementary Information

### From supramolecular hydrogels to functional aerogels: a facile strategy to fabricate Fe<sub>3</sub>O<sub>4</sub>/N-doped graphene composites

Ting He,<sup>a</sup> Zhengyuan Li,<sup>a</sup> Zhifang Sun,<sup>a</sup> Shuzhen Chen,<sup>a</sup> Rujuan Shen,<sup>b</sup> Lunzhao Yi,<sup>c</sup> Liu Deng,<sup>\*,a</sup> Ming Huiyang,<sup>a</sup> Hongtao Liu<sup>a</sup> and Yi Zhang<sup>\*,a</sup>

<sup>a</sup>College of Chemistry and Chemical Engineering, Central South University, Changsha 410083, China.

<sup>b</sup>State Key Laboratory of Power Metallurgy, Central South University, Changsha 410083, China.

<sup>c</sup>Yunnan Food Safety Research Institute, Kunming University of Science and Technology Kunming, 650500 (China)

\*Corresponding authors. E-mail: yzhangcsu@csu.edu.cn (Yi Zhang), dengliu@csu.edu.cn (Liu Deng)

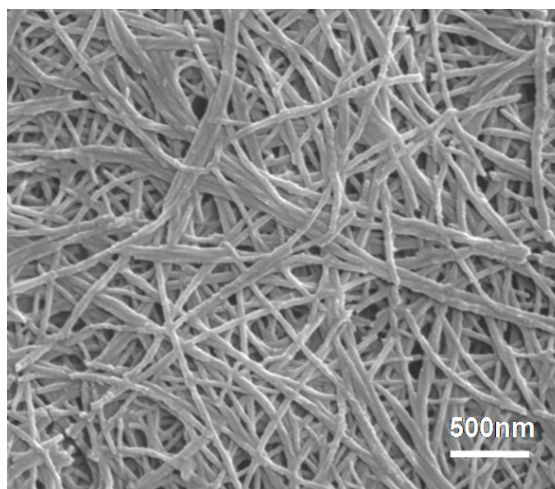

**Fig. S1.** The SEM image of Fc-F, 3 mg mL<sup>-1</sup>.

**Table S1** Several physical parameters of a black monolithic Fe<sub>3</sub>O<sub>4</sub>/N-GAs.

| radius  | height  | mass   | density                  |
|---------|---------|--------|--------------------------|
| 0.46 cm | 0.40 cm | 2.5 mg | 9.30 mg cm <sup>-3</sup> |

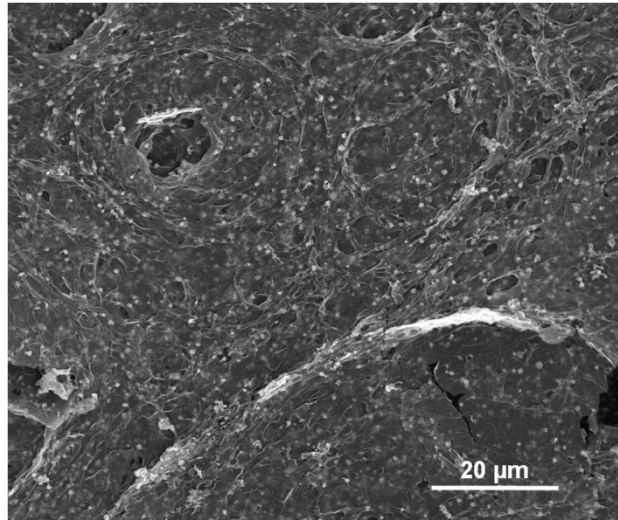

**Fig. S2.** The SEM image of Fe<sub>3</sub>O<sub>4</sub>/N-GAs.

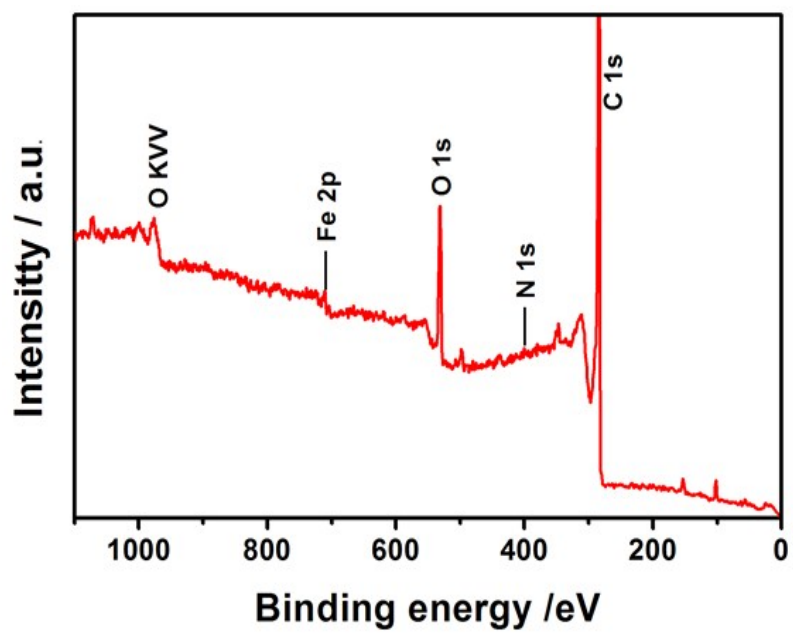

**Fig. S3.** The XPS pattern of Fe<sub>3</sub>O<sub>4</sub>/N-GAs.

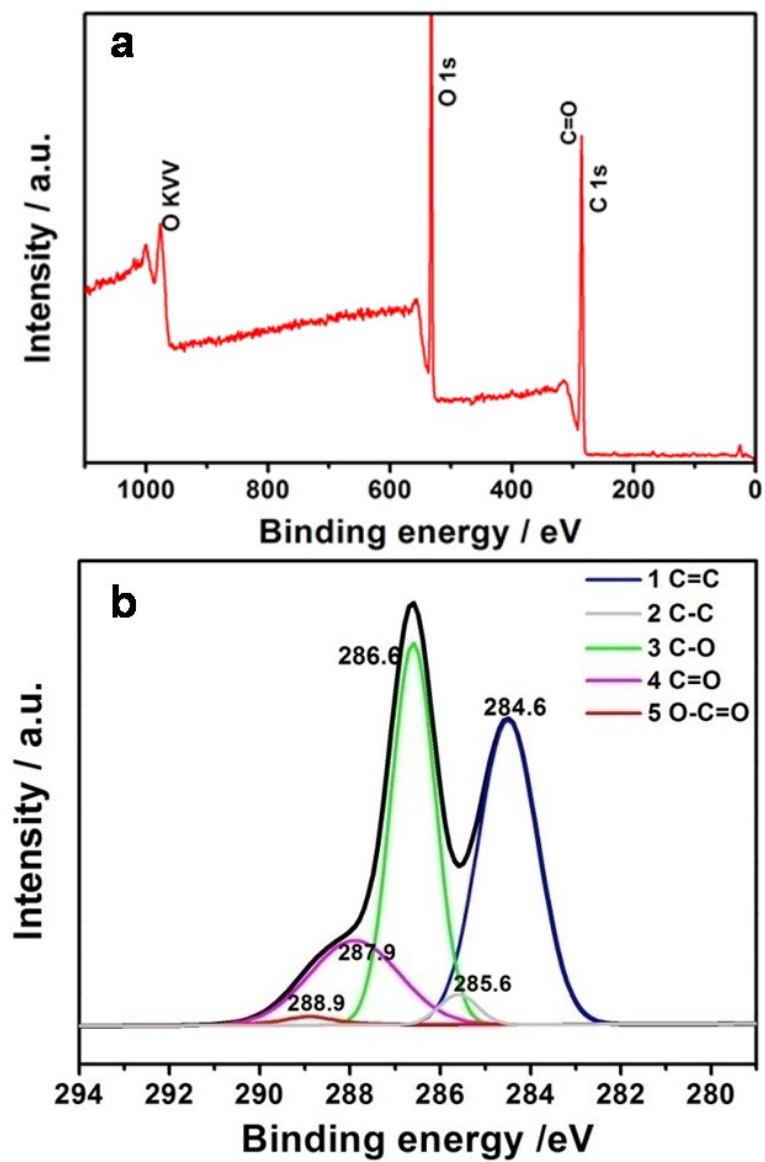

**Fig. S4.** XPS spectra in the range of 0-1100 eV (a) and 282-294 eV (b) for GO.

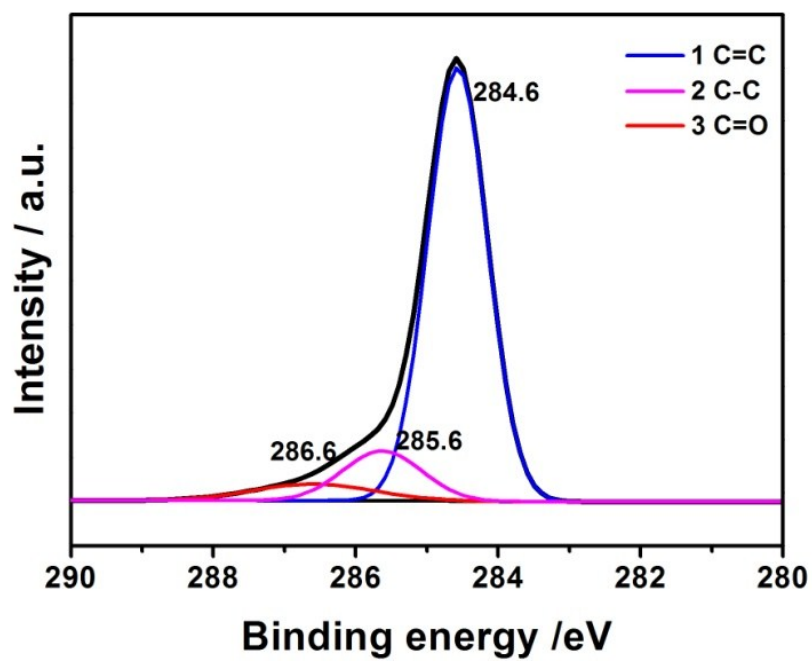

**Fig. S5.** XPS analysis of Fe<sub>3</sub>O<sub>4</sub>/N-GAs: C 1s.

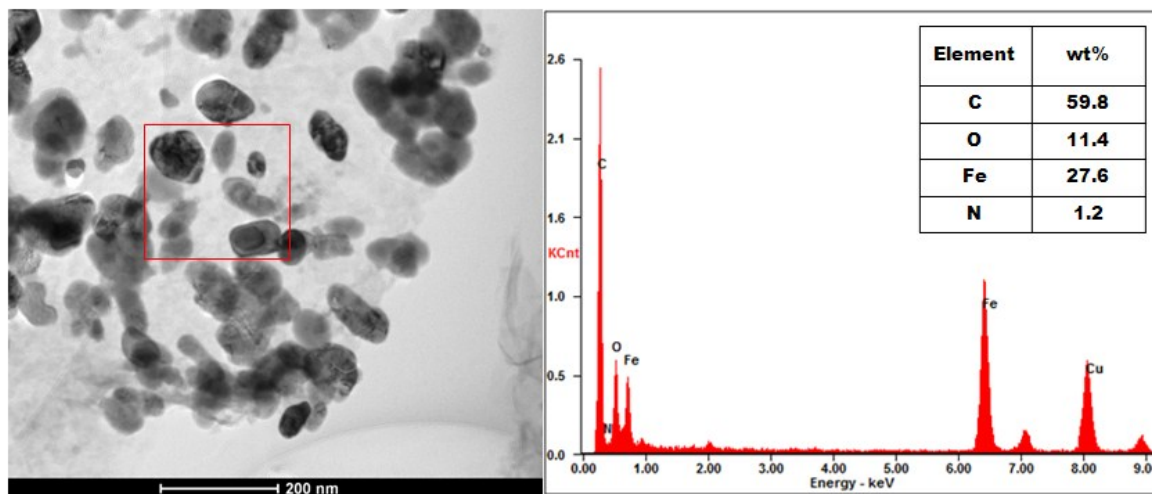

**Fig. S6.** TEM EDS analysis of Fe<sub>3</sub>O<sub>4</sub>/N-GAs.

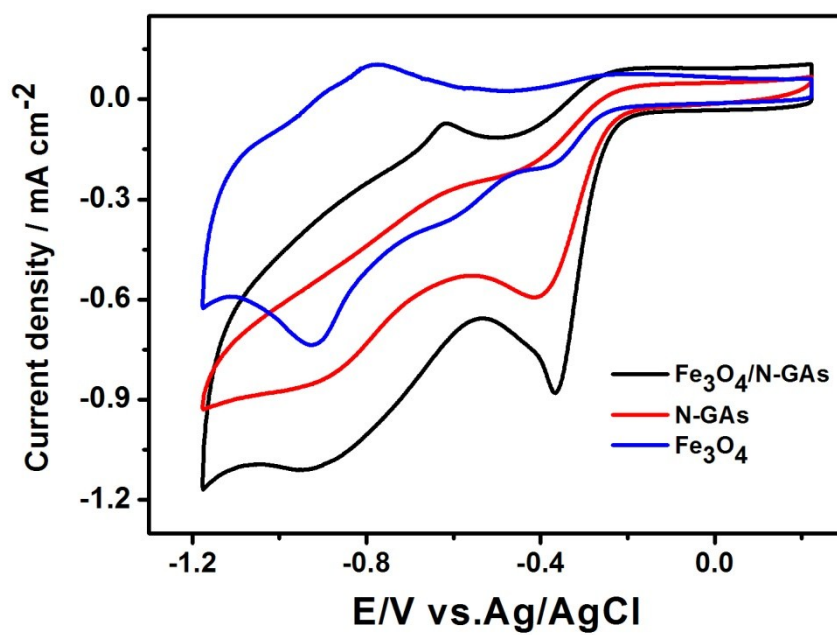

**Fig. S7.** CVs of Fe<sub>3</sub>O<sub>4</sub>, N-GAs and Fe<sub>3</sub>O<sub>4</sub>/N-GAs for ORR in O<sub>2</sub>-saturated 0.1 M NaOH.
